# Supplementary material for: The Warburg effect as a therapeutic target for bladder cancers and intratumoral heterogeneity in associated molecular targets
Source: PubMed Central journal article supplement — Cancer Sci. 2021 Jul 12;112(9):3822–34. doi: 10.1111/cas.15047 (PMC8409428; doi:10.1111/cas.15047), 2021-07-12
Supplement: CAS-112-3822-s001.pdf [file CAS-112-3822-s001.pdf]

(A)

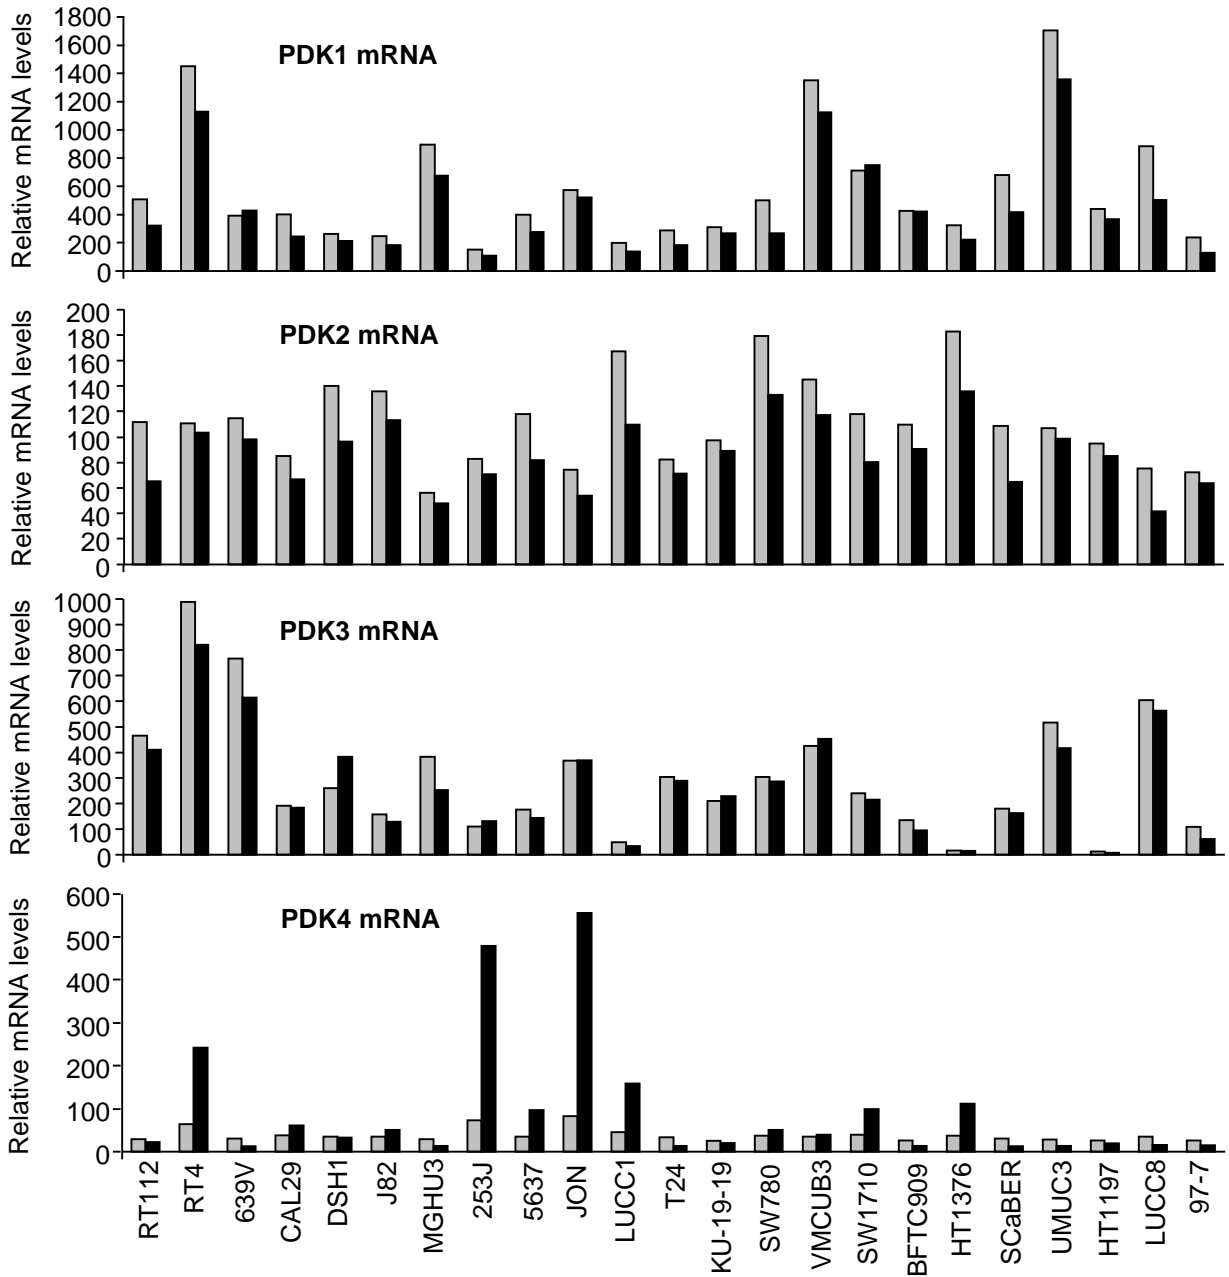

**Figure S4. Cell line mRNA expression of PDKs.**

**A**, mRNA levels of PDKs 1-4 in the indicated bladder cancer cell lines, as determined by microarray gene expression analyses. Results are shown for two different mRNA probe sets for each PDK; probe set identifiers are listed in the Methods. Grey bar: probe 1, black bar: probe 2. Cell lines are ordered from left to right on the basis of cellular lactate release (low to high rate of lactate release).
