# Supplementary material for: The Warburg effect as a therapeutic target for bladder cancers and intratumoral heterogeneity in associated molecular targets
Source: PubMed Central journal article supplement — Cancer Sci. 2021 Jul 12;112(9):3822–34. doi: 10.1111/cas.15047 (PMC8409428; doi:10.1111/cas.15047), 2021-07-12
Supplement: CAS-112-3822-s002.pdf [file CAS-112-3822-s002.pdf]

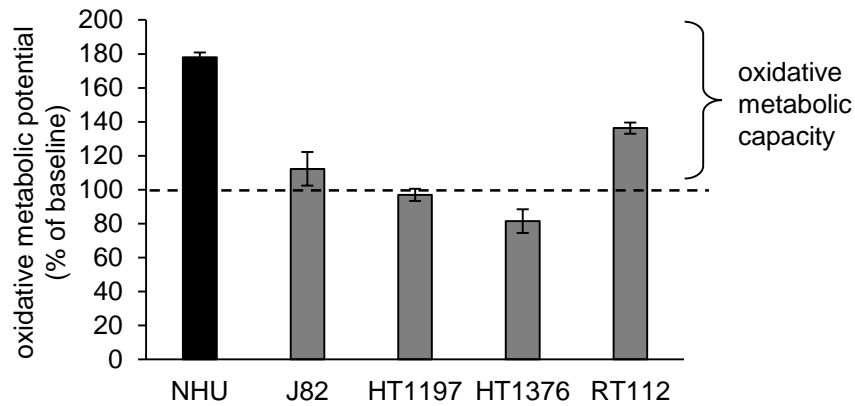

**Figure S6. Oxidative metabolic capacity of normal human urothelial cells and bladder cancer cell lines.**

Oxidative metabolic reserve of normal human urothelial cells (NHU, black bar) and J82, HT1197, HT1376 and RT112 bladder cancer cell lines (grey bars) relative to basal rates of oxygen consumption (arbitrarily set at 100%; dotted line) indicating limited oxidative reserve of bladder cancer cell lines relative to NHU cells. Mean  $\pm$  SD of three independent determinations.
