# Supplementary material for: The Warburg effect as a therapeutic target for bladder cancers and intratumoral heterogeneity in associated molecular targets
Source: PubMed Central journal article supplement — Cancer Sci. 2021 Jul 12;112(9):3822–34. doi: 10.1111/cas.15047 (PMC8409428; doi:10.1111/cas.15047), 2021-07-12
Supplement: CAS-112-3822-s003.pdf [file CAS-112-3822-s003.pdf]

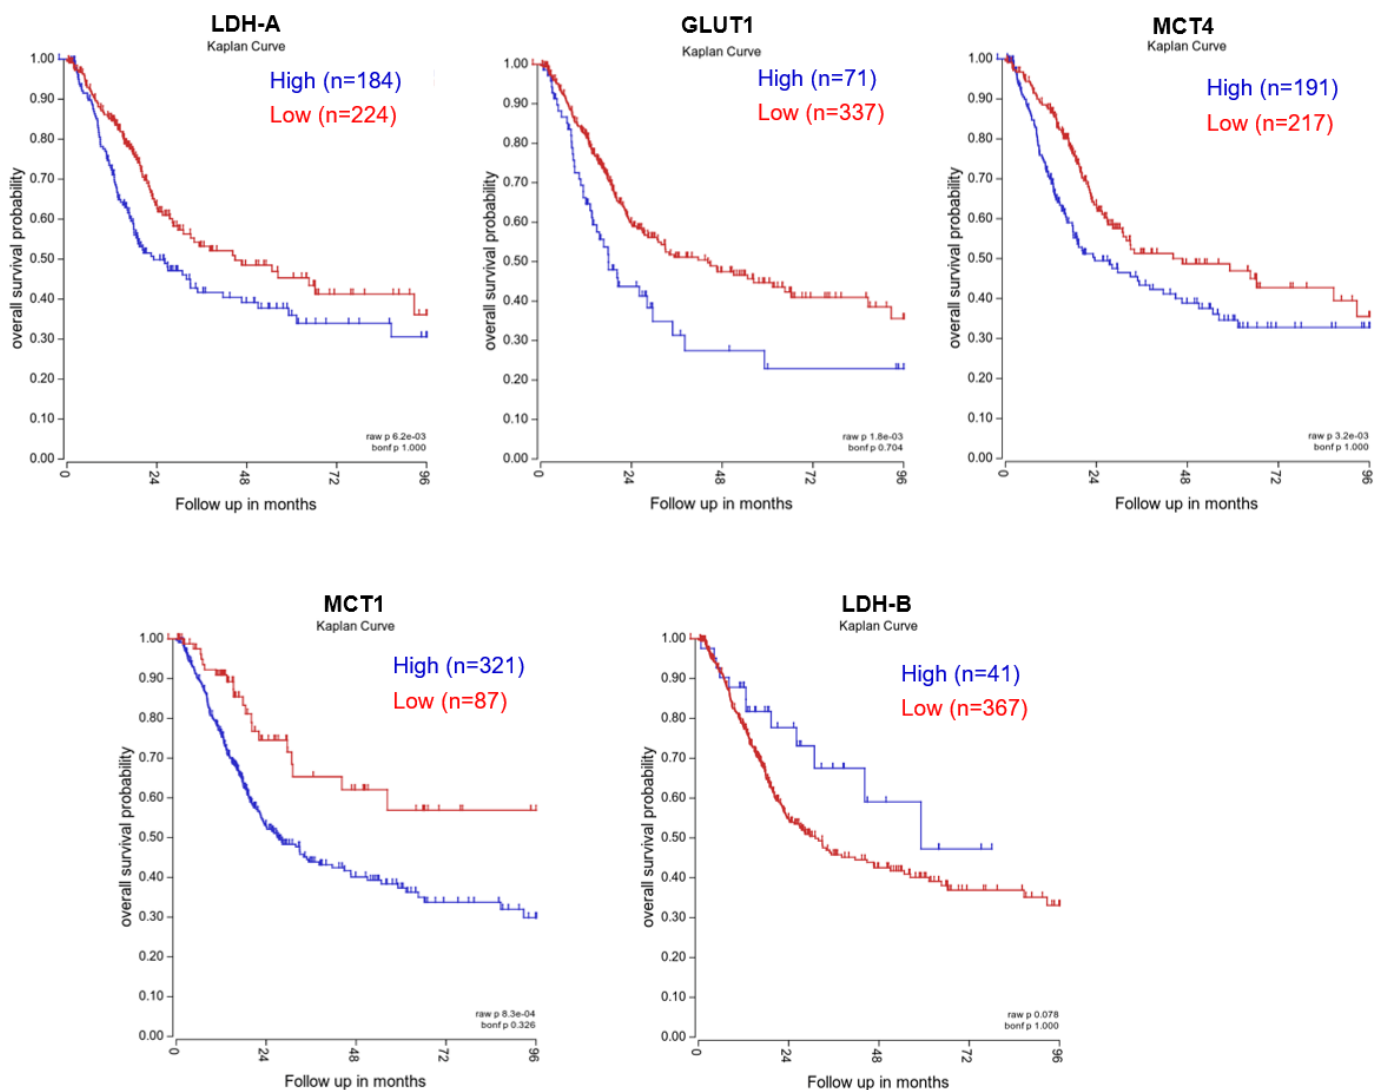

**Figure S8. Association of Warburg effect-associated proteins with patient overall survival.**

Kaplan-Meier curves showing overall survival of bladder cancer patients (n=408, TCGA dataset, Accession BLCA, R2 Genomics Analysis Platform, <http://r2.amc.nl>) grouped by low or high expression of the indicated Warburg effect-associated proteins (LDH-A, GLUT1, MCT4), and for lactate import transporter MCT1 and LDH-B using the automated scan cut-off mode (<http://r2.amc.nl>).
