# Supplementary material for: The Warburg effect as a therapeutic target for bladder cancers and intratumoral heterogeneity in associated molecular targets
Source: PubMed Central journal article supplement — Cancer Sci. 2021 Jul 12;112(9):3822–34. doi: 10.1111/cas.15047 (PMC8409428; doi:10.1111/cas.15047), 2021-07-12
Supplement: CAS-112-3822-s005.pdf [file CAS-112-3822-s005.pdf]

(A)

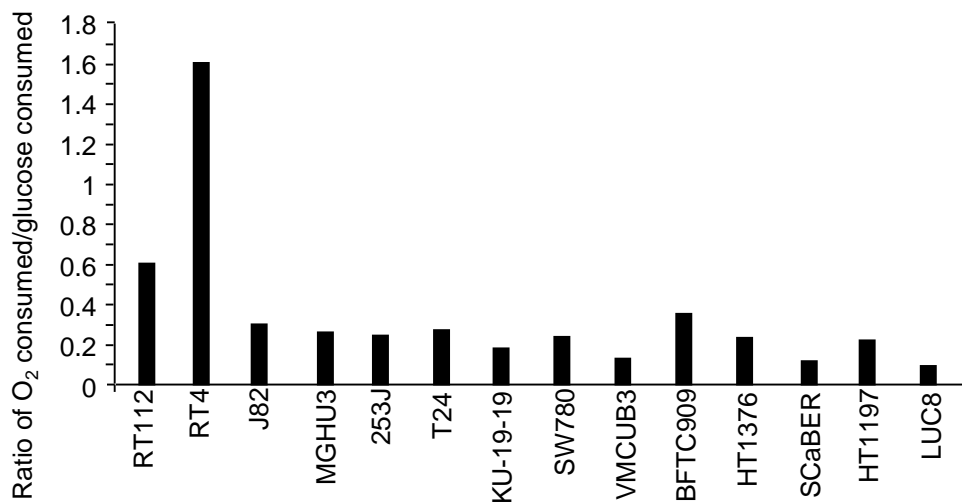

(B)

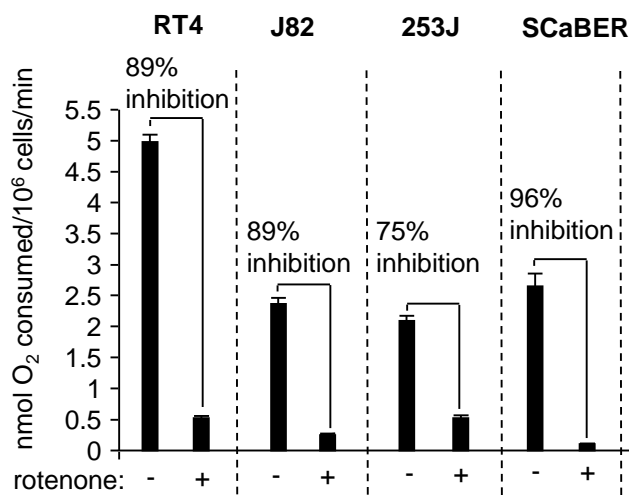

**Figure S2. Effect of rotenone and cellular oxygen consumption relative to glucose consumption.**

**A**, Ratio of the rate of cellular oxygen consumption to the rate of cellular glucose consumption for the indicated human bladder cancer cell lines. The ratios are calculated from the mean rates shown in Figure 2A (O<sub>2</sub> consumed) and Figure 1B (glucose consumed) which are averages from at least three independent experiments.

**B**, The effects of the mitochondrial complex I inhibitor rotenone on the rate of cellular oxygen consumption for the indicated cell lines. Oxygen consumption rates (nmoles of oxygen consumed per 10<sup>6</sup> cells per minute) were measured before and after the addition of 1 $\mu$ M rotenone. Mean  $\pm$  SD from three independent experiments.
