# Supplementary material for: The Warburg effect as a therapeutic target for bladder cancers and intratumoral heterogeneity in associated molecular targets
Source: PubMed Central journal article supplement — Cancer Sci. 2021 Jul 12;112(9):3822–34. doi: 10.1111/cas.15047 (PMC8409428; doi:10.1111/cas.15047), 2021-07-12
Supplement: CAS-112-3822-s006.pdf [file CAS-112-3822-s006.pdf]

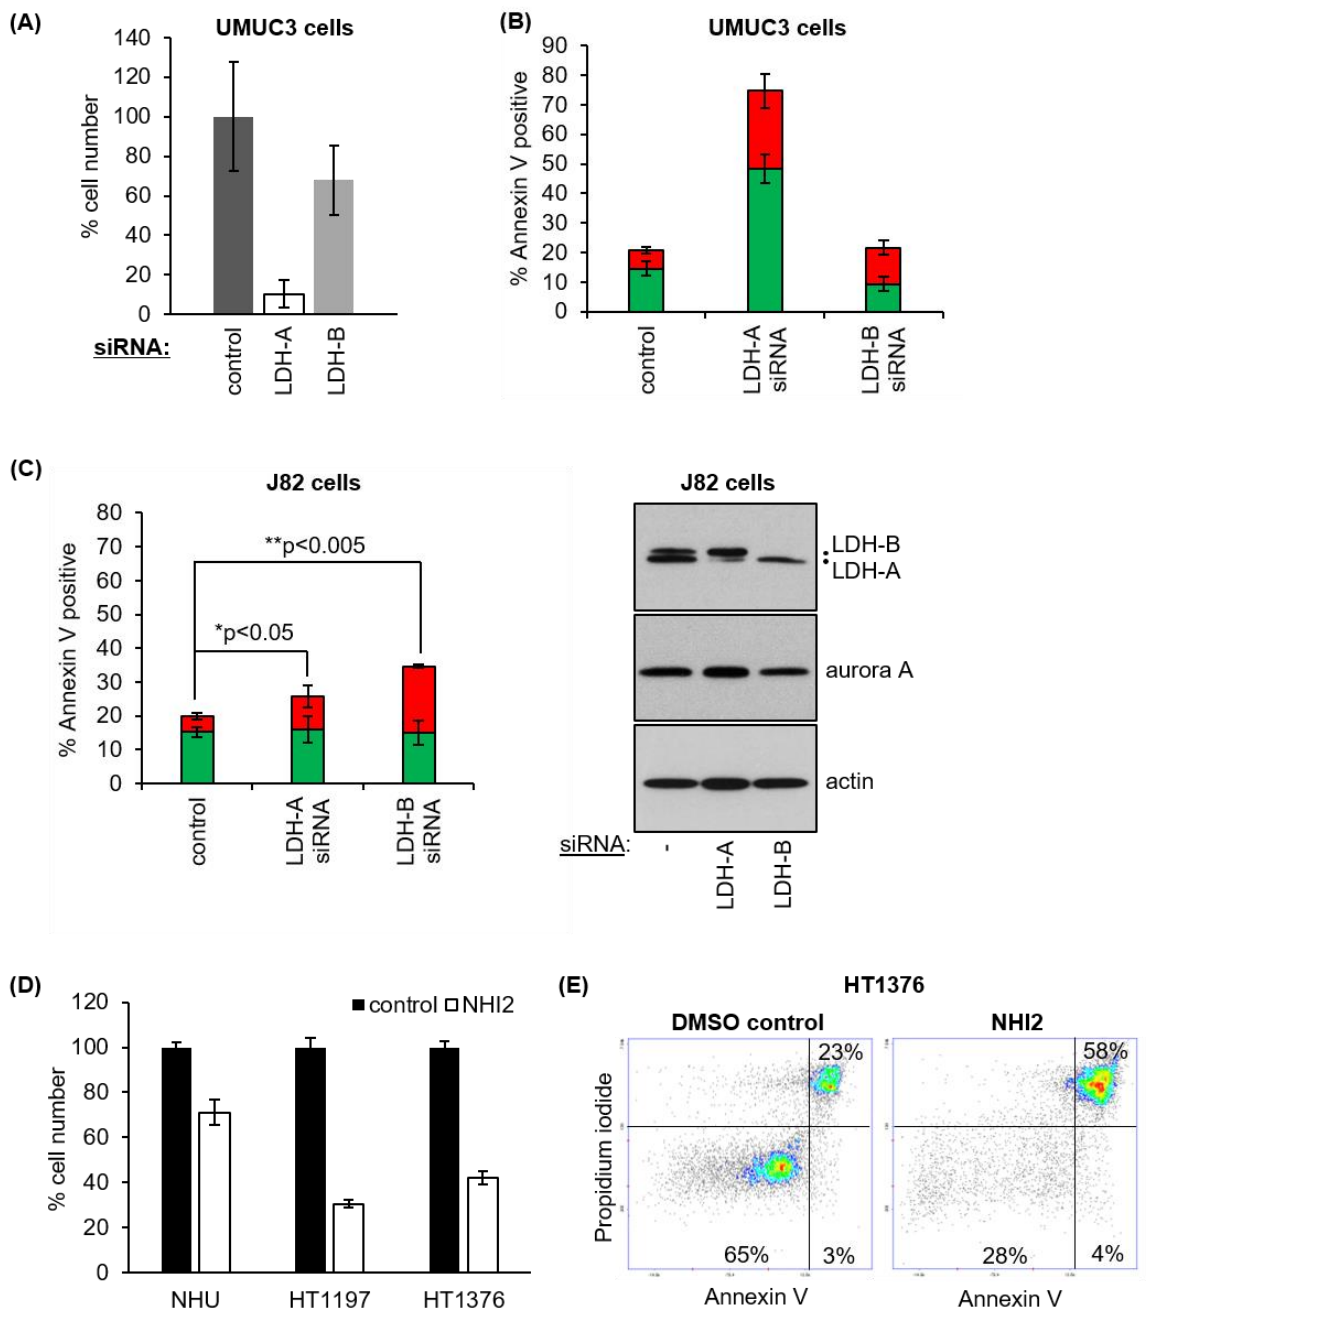

**Figure S5. Induction of apoptotic cell death in bladder cancer cell lines via LDH-A knock-down or inhibition.**

**A**, Effect of LDH-A or LDH-B knock-down by RNAi on UMUC3 total cell number 72h following siRNA transfection, cell number is expressed as a percentage relative to that of control transfected cells. Mean  $\pm$  SD of three independent determinations.

**B**, Proportion of early and late stage apoptotic UMUC3 bladder cancer cells 72h following siRNA transfection with LDH-A or LDH-B siRNA, mean  $\pm$  SD of three independent determinations. Green bars indicate early stage apoptotic cells (annexin V positive, propidium iodide (PI) negative), red bars indicate late stage apoptotic cells (annexin V positive, PI positive).

**C**, Proportion of early and late stage apoptotic J82 bladder cancer cells 72h following siRNA transfection with LDH-A or LDH-B siRNA, mean  $\pm$  SD of three independent determinations. Green bars indicate early stage apoptotic cells (annexin V positive, PI negative), red bars indicate late stage apoptotic cells (annexin V positive, PI positive). Statistical significance as determined by student's t-test, \*  $p < 0.05$ , \*\*  $p < 0.005$ . Immunoblots shows selective depletion of LDH-A and LDH-B by their respective siRNAs and expression of aurora A kinase in J82 cells.

**D**, Effect of 48h cell exposure to LDH inhibitor NHI2 (15 $\mu$ M) on normal human urothelial cells (NHUC) and bladder cancer cell lines HT1197 and HT1376. Cell number expressed as a percentage relative to vehicle control treated cells; mean  $\pm$  SD of three independent determinations.

**E**, Representative dot plots of NHI2-treated HT1376 cells (48h 15 $\mu$ M NHI2) compared to vehicle control treated cells and following annexin V staining for detection of early and late stage apoptotic cells. Lower left quadrant indicates live cells; lower right quadrant (annexin V positive, PI negative) indicates % of early stage apoptotic cells; upper right quadrant indicates % of late stage apoptotic cells (annexin V positive, PI positive).
