# Supplementary material for: The Warburg effect as a therapeutic target for bladder cancers and intratumoral heterogeneity in associated molecular targets
Source: PubMed Central journal article supplement — Cancer Sci. 2021 Jul 12;112(9):3822–34. doi: 10.1111/cas.15047 (PMC8409428; doi:10.1111/cas.15047), 2021-07-12
Supplement: CAS-112-3822-s007.pdf [file CAS-112-3822-s007.pdf]

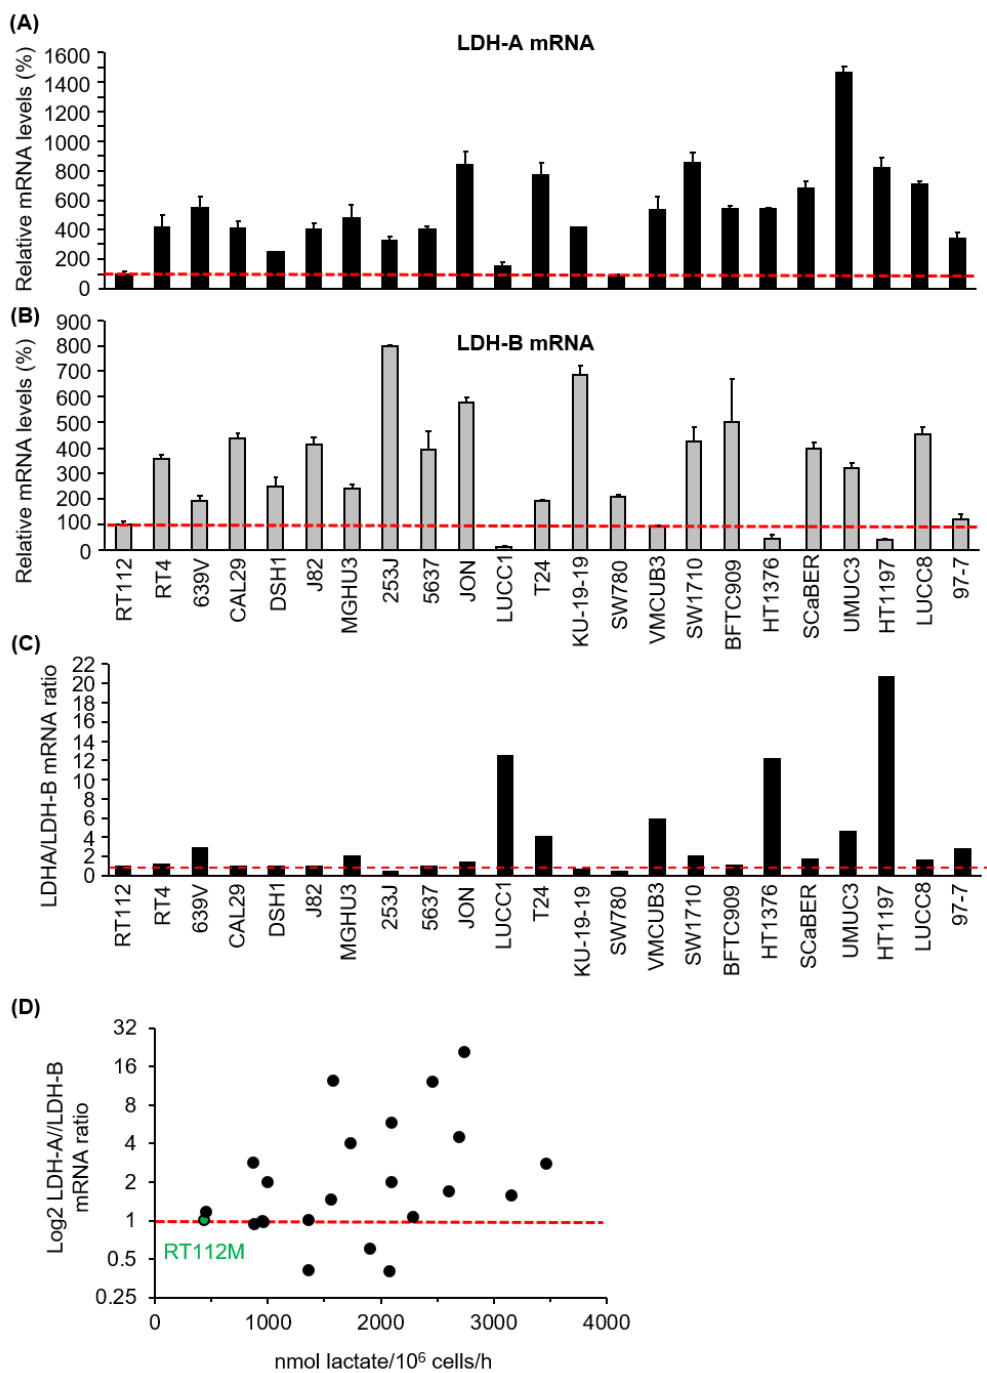

**Figure S3. Cell line mRNA expression of LDH-A and LDH-B.**

**A, B**, mRNA levels of LDH-A (A) and LDH-B (B) in the indicated human bladder cancer cell lines, ordered from left to right on the basis of increasing rates of cellular lactate release. mRNA levels are expressed as a percentage relative to LDH-A and LDH-B mRNA expression levels in RT112 urothelial carcinoma cells which are set at 100%. Quantitative real-time RT-PCR, values represent the mean  $\pm$  SD of three independent mRNA determinations.

**C**, Ratio of LDH-A mRNA to LDH-B mRNA in the indicated human bladder cancer cell lines. The ratios are calculated from the mean mRNA levels shown in (A) and (B). Cell lines are ordered from left to right from low to high rate of lactate release.

**D**, Scatter plot of LDH-A/LDH-B mRNA ratio and rate of cellular lactate release with each individual cell line represented by a black circle and indicated relative to RT112 cells (green circle) which showed the lowest rate of lactate release. Cell lines above the dotted red line express more LDH-A mRNA than LDH-B (ratio >1).
