# Supplementary material for: The Warburg effect as a therapeutic target for bladder cancers and intratumoral heterogeneity in associated molecular targets
Source: PubMed Central journal article supplement — Cancer Sci. 2021 Jul 12;112(9):3822–34. doi: 10.1111/cas.15047 (PMC8409428; doi:10.1111/cas.15047), 2021-07-12
Supplement: CAS-112-3822-s008.pdf [file CAS-112-3822-s008.pdf]

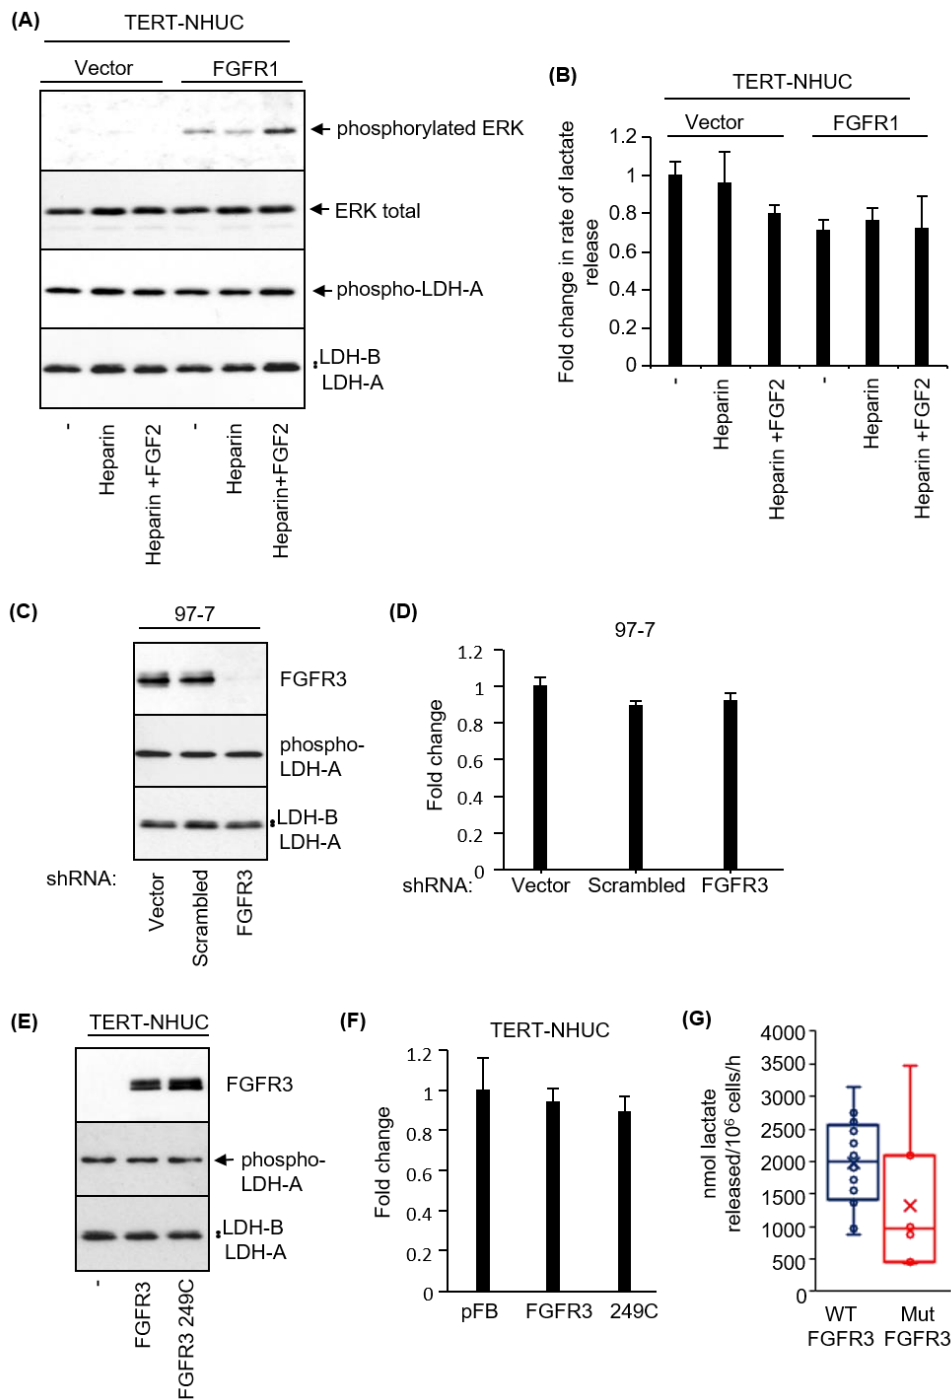

**Figure S1. Effect of FGFR1 and FGFR3 expression on LDH-A Y10 phosphorylation and cellular lactate release.**

**A**, Immortalised normal human urothelial cells (TERT-NHUC) stably transfected with FGFR1 expression vector were treated with FGF2 and heparin to induce FGFR1 signalling; as indicated by increased phosphorylated ERK. Effects on phosphorylated Y10 LDH-A levels are shown.

**B**, Effect of FGFR1 signalling on the rate of cellular lactate release in TERT-NHUCs. TERT-NHUC cells stably transfected with FGFR1 expression vector or control vector were treated with FGF2+heparin as in (A) and rates of cellular lactate release determined. Fold changes in rate of cellular lactate release relative to empty vector control cells are indicated. Mean  $\pm$  SD of three independent determinations.

**C**, Representative immunoblots showing FGFR3 protein knock-down by FGFR3 shRNA in 97-7 bladder cancer cells and effects on LDH-A and LDH-B protein levels and LDH-A Y10 phosphorylation levels.

**D**, Effect of FGFR3 protein knock-down by FGFR3 shRNA on rates of cellular lactate release in 97-7 bladder cancer cells. Fold changes in rate of cellular lactate release relative to shRNA vector control cells are indicated. Mean  $\pm$  SD of three independent determinations.

**E**, Representative immunoblots showing the effect of overexpressing FGFR3 or the FGFR3 S249C activating mutant on LDH-A and LDH-B expression and phosphorylated LDH-A (Y10) in immortalised normal human urothelial cells (TERT-NHUCs).

**F**, Effect of overexpressing FGFR3 or FGFR3 S249C activating mutant on rates of lactate release in TERT-NHUCs. Fold changes in rate of cellular lactate release relative to pFB vector control cells are indicated. Mean  $\pm$  SD of three independent determinations.

**G**, Box plot showing the mean rates of cellular lactate release by the panel of bladder cancer cell lines (Fig.1A) following cell line clustering by FGFR3 mutational status.
