# Supplementary material for: The Warburg effect as a therapeutic target for bladder cancers and intratumoral heterogeneity in associated molecular targets
Source: PubMed Central journal article supplement — Cancer Sci. 2021 Jul 12;112(9):3822–34. doi: 10.1111/cas.15047 (PMC8409428; doi:10.1111/cas.15047), 2021-07-12
Supplement: CAS-112-3822-s011.pdf [file CAS-112-3822-s011.pdf]

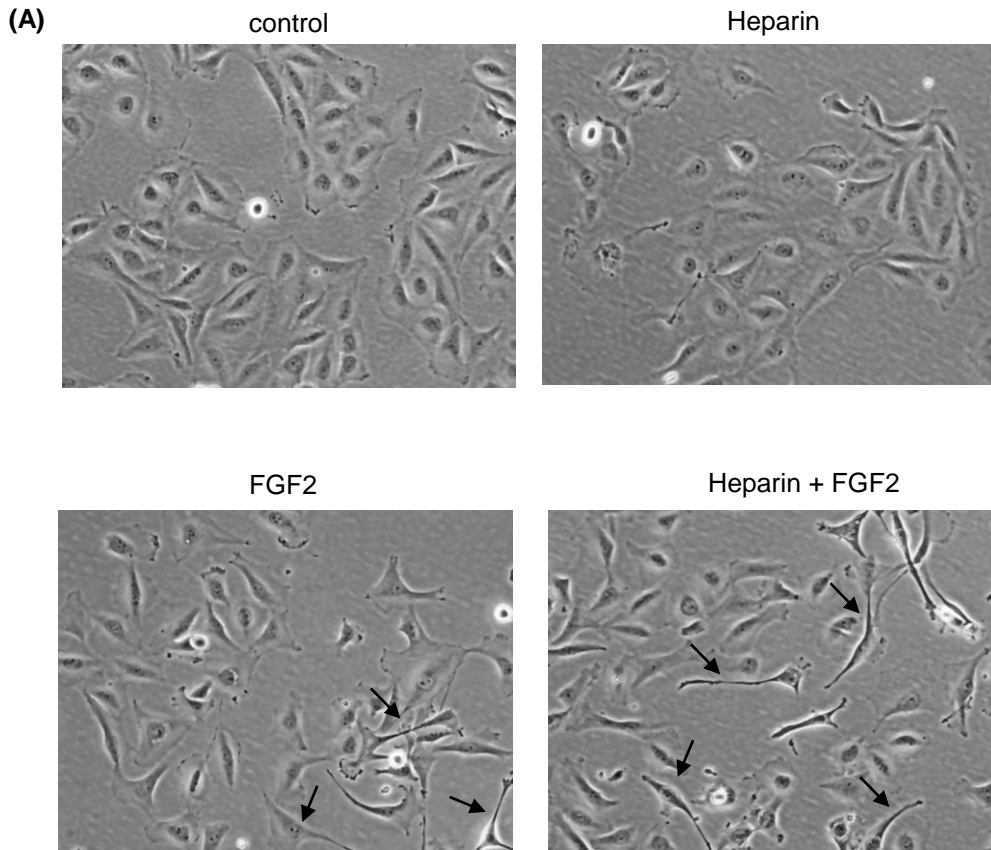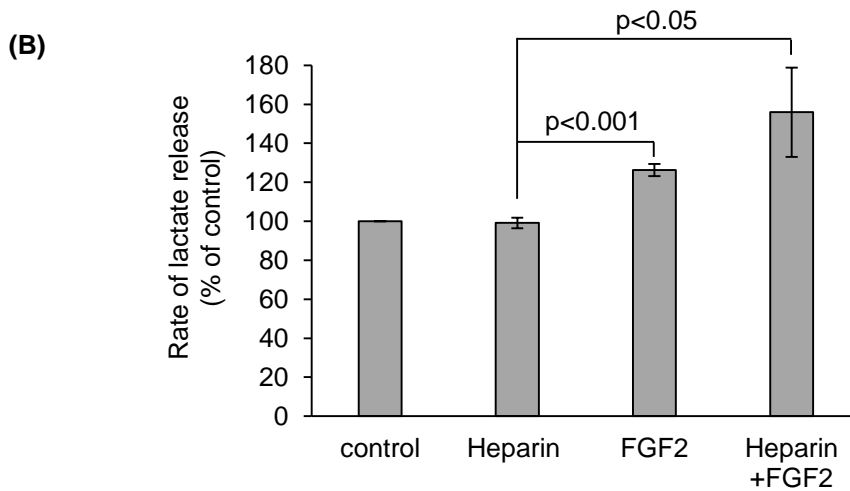

**Figure S7. EMT induction in J82 bladder cancer cells increases rate of cellular lactate release.**

**A**, Representative phase contrast images showing induction of a mesenchymal-like morphology (indicated by black arrows) in J82 bladder cancer cells following 48h treatment with FGF2 or FGF2 and heparin.

**B**, Effect of indicated treatments on the rate of cellular lactate release by J82 cells relative to that of solvent control treated cells, mean  $\pm$  SD of three independent determinations.
